# Supplementary material
Source: PubMed Central journal article supplement (PMC6838695)
Supplement: DS1_JVDI_10.1177_1040638719835577.pdf [file DS1_JVDI_10.1177_1040638719835577.pdf]

JVDI: Supplementary material

Becker et al. Identification of fungal isolates by MALDI-TOF mass spectrometry in veterinary practice: validation of a web application

**Supplementary Table 1.** Details on the PCR assays used for DNA sequencing, and assays used for the identification of each species.

| Name of PCR assay                  | Locus                                    | Primers           | Reference |
|------------------------------------|------------------------------------------|-------------------|-----------|
| ACT                                | Actin                                    | ACT-512F/ACT-783R | 2         |
| ACT-2                              | Actin                                    | ACT1F-Dh/ACT1R-Dh | 7         |
| BT                                 | Beta-tubulin                             | BT2a/BT2b         | 4         |
| BT-2                               | Beta-tubulin                             | Ben2f/BT2b        | 5         |
| CAL                                | Calmodulin                               | CL1/CL2A          | 8         |
| CAL-2                              | Calmodulin                               | CF1L/CF4          | 9         |
| GAPDH                              | Glyceraldehyde 3-phosphate dehydrogenase | GPD1/GPD2         | 1         |
| ITS                                | Internal transcribed spacer              | ITS4/ITS5         | 11        |
| LSU                                | 26S rDNA                                 | LR0R/LR5          | 10        |
| LSU-2                              | 23S rDNA                                 | No name published | 3         |
| RPB2                               | RNA polymerase II subunit                | RPB2-5F/RPB2-7cR  | 6         |
| TEF                                | Translation elongation factor 1 alpha    | EF1-728F/EF1-986R | 2         |
| Species                            | PCR assay for identification of species  |                   |           |
| <i>Alternaria hordeiaustralica</i> | ITS, BT, TEF, GAPDH                      |                   |           |
| <i>Arthrimum marii</i>             | ITS, BT, TEF                             |                   |           |
| <i>Aspergillus flavus</i>          | ITS, BT                                  |                   |           |
| <i>Aspergillus fumigatus</i>       | ITS, BT                                  |                   |           |
| <i>Aspergillus nidulans</i>        | ITS, BT, CAL                             |                   |           |
| <i>Aspergillus tubingensis</i>     | ITS, BT-2, CAL-2                         |                   |           |

| Species                               | PCR assay for identification of species |
|---------------------------------------|-----------------------------------------|
| <i>Aspergillus welwitschiae</i>       | ITS, BT-2, CAL-2                        |
| <i>Beauveria bassiana</i>             | ITS, BT                                 |
| <i>Candida albicans</i>               | ITS                                     |
| <i>Candida ethanolica</i>             | ITS                                     |
| <i>Candida glabrata</i>               | ITS                                     |
| <i>Candida inconspicua</i>            | ITS                                     |
| <i>Candida tropicalis</i>             | ITS                                     |
| <i>Chaetomium cochlioides</i>         | ITS, BT                                 |
| <i>Cladosporium allicinum</i>         | ITS, TEF, ACT                           |
| <i>Clavispora lusitaniae</i>          | ITS                                     |
| <i>Cutaneotrichosporon smithiae</i>   | ITS                                     |
| <i>Cyberlindnera fabianii</i>         | ITS                                     |
| <i>Cyberlindnera mississippiensis</i> | ITS                                     |
| <i>Debaryomyces hansenii</i>          | ITS, ACT-2                              |
| <i>Debaryomyces</i> sp.               | ITS, ACT-2                              |
| <i>Didymella pomorum</i>              | ITS, BT, ACT                            |
| <i>Diutina catenulata</i>             | ITS                                     |
| <i>Diutina rugosa</i>                 | ITS                                     |
| <i>Donkioporia expansa</i>            | ITS                                     |
| <i>Epicoccum nigrum</i>               | ITS, BT                                 |
| <i>Fusarium cerealis</i>              | ITS, TEF                                |
| <i>Fusarium incarnatum-equiseti</i>   | ITS, TEF                                |
| <i>Galactomyces candidus</i>          | ITS                                     |
| <i>Geosmithia</i> sp.                 | ITS, BT                                 |
| <i>Gymnoascus reesii</i>              | ITS                                     |
| <i>Holtermanniella</i> sp.            | ITS                                     |
| <i>Kazachstania bovina</i>            | ITS                                     |
| <i>Kazachstania telluris</i>          | ITS                                     |

| Species                          | PCR assay for identification of species |
|----------------------------------|-----------------------------------------|
| <i>Kluyveromyces marxianus</i>   | ITS                                     |
| <i>Lichtheimia corymbifera</i>   | ITS                                     |
| <i>Lichtheimia ramosa</i>        | ITS                                     |
| <i>Magnusiomyces capitatus</i>   | ITS                                     |
| <i>Meyerozyma guilliermondii</i> | ITS                                     |
| <i>Microsporium canis</i>        | ITS, BT                                 |
| <i>Mortierella alpina</i>        | ITS                                     |
| <i>Mucor circinelloides</i>      | ITS                                     |
| <i>Mucor hiemalis</i>            | ITS, BT                                 |
| <i>Nannizzia gypsea</i>          | ITS, BT                                 |
| <i>Mortierella alpina</i>        | ITS                                     |
| <i>Mucor circinelloides</i>      | ITS                                     |
| <i>Mucor hiemalis</i>            | ITS, BT                                 |
| <i>Nannizzia gypsea</i>          | ITS, BT                                 |
| <i>Paecilomyces saturatus</i>    | ITS, BT                                 |
| <i>Paecilomyces variotii</i>     | ITS, BT, CAL                            |
| <i>Penicillium fellutanum</i>    | ITS, BT                                 |
| <i>Phoma</i> sp.                 | ITS, BT                                 |
| <i>Pichia deserticola</i>        | LSU                                     |
| <i>Pichia fermentans</i>         | ITS                                     |
| <i>Pichia kudriavzevii</i>       | ITS                                     |
| <i>Prototheca zopfii</i>         | LSU-2                                   |
| <i>Pseudogymnoascus pannorum</i> | ITS                                     |
| <i>Pseudogymnoascus</i> sp.      | ITS, BT, RPB2                           |
| <i>Purpureocillium lilacinum</i> | ITS, BT                                 |
| <i>Rhizopus microsporus</i>      | ITS                                     |
| <i>Rhizopus stolonifer</i>       | LSU                                     |
| <i>Saccharomyces cerevisiae</i>  | ITS                                     |

| Species                         | PCR assay for identification of species |
|---------------------------------|-----------------------------------------|
| <i>Scedosporium boydii</i>      | ITS, BT                                 |
| <i>Sordaria fimicola</i>        | ITS, BT                                 |
| <i>Sordaria lappae</i>          | ITS, BT                                 |
| <i>Talaromyces piceus</i>       | ITS, BT                                 |
| <i>Trichoderma capillare</i>    | ITS, TEF                                |
| <i>Trichoderma hamatum</i>      | ITS, TEF                                |
| <i>Trichophyton benhamiae</i>   | ITS, TEF                                |
| <i>Trichophyton equinum</i>     | ITS, TEF                                |
| <i>Trichophyton</i> sp.         | ITS, TEF, LSU                           |
| <i>Wickerhamomyces anomalus</i> | ITS                                     |
| <i>Yamadazyma mexicana</i>      | ITS                                     |

**Supplementary Table 2.** Identification by species of the 290 isolates using either MALDI-TOF MS or classical methods.

| Species                                    | MALDI-TOF MS identification |                        |                       |       | Classical identification |                        |                       |       |
|--------------------------------------------|-----------------------------|------------------------|-----------------------|-------|--------------------------|------------------------|-----------------------|-------|
|                                            | Correct at species level    | Correct at genus level | Mis-ID at genus level | No ID | Correct at species level | Correct at genus level | Mis-ID at genus level | No ID |
| <i>Alternaria hordeiaustralica</i> (1), NA |                             | 1                      |                       |       |                          | 1                      |                       |       |
| <i>Arthrimum marii</i> (1)                 | 1                           |                        |                       |       |                          | 1                      |                       |       |
| <i>Aspergillus flavus</i> (1)              | 1                           |                        |                       |       |                          |                        |                       | 1     |
| <i>Aspergillus fumigatus</i> (36)          | 36                          |                        |                       |       | 35                       |                        |                       | 1     |
| <i>Aspergillus nidulans</i> (1)            | 1                           |                        |                       |       |                          |                        |                       | 1     |
| <i>Aspergillus tubingensis</i> (1)         | 1                           |                        |                       |       | 1*                       |                        |                       |       |
| <i>Aspergillus welwitschiae</i> (1)        | 1                           |                        |                       |       | 1*                       |                        |                       |       |
| <i>Beauveria bassiana</i> (3)              | 3                           |                        |                       |       | 1                        |                        | 2                     |       |

Identification of veterinary fungal isolates by MALDI-TOF MS

| Species                                       | MALDI-TOF MS identification |                        |                       |       | Classical identification |                        |                       |       |
|-----------------------------------------------|-----------------------------|------------------------|-----------------------|-------|--------------------------|------------------------|-----------------------|-------|
|                                               | Correct at species level    | Correct at genus level | Mis-ID at genus level | No ID | Correct at species level | Correct at genus level | Mis-ID at genus level | No ID |
| <i>Candida albicans</i> (16)                  | 16                          |                        |                       |       | 14                       | 1                      |                       | 1     |
| <i>Candida ethanolica</i> (4), NA             |                             |                        |                       | 4     |                          | 2                      | 1                     | 1     |
| <i>Candida glabrata</i> (10)                  | 10                          |                        |                       |       | 7                        |                        |                       | 3     |
| <i>Candida inconspicua</i> (4)                | 4                           |                        |                       |       | 4                        |                        |                       |       |
| <i>Candida tropicalis</i> (1)                 | 1                           |                        |                       |       |                          |                        |                       | 1     |
| <i>Chaetomium cochlioides</i> (2)             | 2                           |                        |                       |       |                          | 1                      | 1                     |       |
| <i>Cladosporium allicinum</i> (1)             | 1                           |                        |                       |       |                          |                        | 1                     |       |
| <i>Clavispora lusitaniae</i> (1)              | 1                           |                        |                       |       |                          |                        | 1                     |       |
| <i>Cutaneotrichosporon smithiae</i> (1), NA   |                             |                        |                       | 1     |                          |                        | 1                     |       |
| <i>Cyberlindnera fabianii</i> (1)             | 1                           |                        |                       |       |                          |                        |                       | 1     |
| <i>Cyberlindnera mississippiensis</i> (1), NA |                             |                        |                       | 1     |                          |                        |                       | 1     |
| <i>Debaryomyces hansenii</i> (2)              | 2                           |                        |                       |       | 1                        |                        | 1                     |       |
| <i>Debaryomyces</i> sp. (1), NA               |                             |                        |                       | 1     |                          |                        | 1                     |       |
| <i>Didymella pomorum</i> (1), NA              |                             |                        | 1                     |       |                          |                        | 1                     |       |
| <i>Diutina catenulata</i> (14)                | 14                          |                        |                       |       | 12                       |                        |                       | 2     |
| <i>Diutina rugosa</i> (17)                    | 17                          |                        |                       |       | 14                       |                        |                       | 3     |
| <i>Donkioporia expansa</i> (2), NA            |                             |                        |                       | 2     |                          |                        | 2                     |       |
| <i>Epicoccum nigrum</i> (3)                   | 3                           |                        |                       |       | 2                        |                        | 1                     |       |
| <i>Fusarium cerealis</i> (1), NA              |                             |                        |                       | 1     |                          |                        | 1                     |       |
| <i>Fusarium incarnatum-equiseti</i> (1)       | 1                           |                        |                       |       |                          |                        | 1                     |       |
| <i>Galactomyces candidus</i> (11)             | 11                          |                        |                       |       | 2                        |                        |                       | 9     |
| <i>Geosmithia</i> sp. (1), NA                 |                             | 1                      |                       |       |                          |                        | 1                     |       |
| <i>Gymnoascus reesii</i> (1)                  | 1                           |                        |                       |       |                          |                        | 1                     |       |
| <i>Holtermanniella</i> sp. (2), NA            |                             |                        | 1                     | 1     |                          |                        | 2                     |       |
| <i>Kazachstania bovina</i> (1)                | 1                           |                        |                       |       |                          | 1                      |                       |       |

## Identification of veterinary fungal isolates by MALDI-TOF MS

| Species                              | MALDI-TOF MS identification |                        |                       |       | Classical identification |                        |                       |       |
|--------------------------------------|-----------------------------|------------------------|-----------------------|-------|--------------------------|------------------------|-----------------------|-------|
|                                      | Correct at species level    | Correct at genus level | Mis-ID at genus level | No ID | Correct at species level | Correct at genus level | Mis-ID at genus level | No ID |
| <i>Kazachstania telluris</i> (3)     | 3                           |                        |                       |       | 2                        |                        |                       | 1     |
| <i>Kluyveromyces marxianus</i> (2)   | 2                           |                        |                       |       | 1                        |                        |                       | 1     |
| <i>Lichtheimia corymbifera</i> (3)   | 3                           |                        |                       |       | 2                        | 1                      |                       |       |
| <i>Lichtheimia ramosa</i> (3), NA    |                             |                        |                       | 3     |                          | 2                      |                       | 1     |
| <i>Magnusiomyces capitatus</i> (1)   | 1                           |                        |                       |       | 1                        |                        |                       |       |
| <i>Meyerozyma guilliermondii</i> (2) | 2                           |                        |                       |       | 2                        |                        |                       |       |
| <i>Microsporium canis</i> (7)        | 7                           |                        |                       |       | 3                        | 3                      | 1                     |       |
| <i>Mortierella alpina</i> (1), NA    |                             |                        |                       | 1     |                          |                        | 1                     |       |
| <i>Mucor circinelloides</i> (12)     | 11                          |                        | 1                     |       |                          | 2                      | 2                     | 8     |
| <i>Mucor hiemalis</i> (1)            |                             |                        |                       | 1     |                          | 1                      |                       |       |
| <i>Nannizzia gypsea</i> (1)          | 1                           |                        |                       |       | 1                        |                        |                       |       |
| <i>Paecilomyces saturatus</i> (5)    | 5                           |                        |                       |       |                          |                        |                       | 5     |
| <i>Paecilomyces variotii</i> (1)     | 1                           |                        |                       |       | 1                        |                        |                       |       |
| <i>Penicillium fellutanum</i> (1)    | 1                           |                        |                       |       |                          | 1                      |                       |       |
| <i>Phoma</i> sp. (1), NA             |                             |                        |                       | 1     |                          |                        | 1                     |       |
| <i>Pichia deserticola</i> (1), NA    |                             |                        |                       | 1     |                          |                        | 1                     |       |
| <i>Pichia fermentans</i> (45)        | 45                          |                        |                       |       | 31                       |                        |                       | 14    |
| <i>Pichia kudriavzevii</i> (26)      | 26                          |                        |                       |       | 25                       |                        |                       | 1     |
| <i>Prototheca zopfii</i> (1), NA     |                             |                        |                       | 1     |                          |                        |                       | 1     |
| <i>Pseudogymnoascus pannorum</i> (1) | 1                           |                        |                       |       |                          |                        | 1                     |       |
| <i>Pseudogymnoascus</i> sp. (1), NA  |                             | 1                      |                       |       |                          |                        | 1                     |       |
| <i>Purpureocillium lilacinum</i> (4) | 4                           |                        |                       |       | 1                        |                        | 3                     |       |
| <i>Rhizopus microsporus</i> (1)      | 1                           |                        |                       |       |                          | 1                      |                       |       |
| <i>Rhizopus stolonifer</i> (1)       | 1                           |                        |                       |       | 1                        |                        |                       |       |
| <i>Saccharomyces cerevisiae</i> (2)  | 2                           |                        |                       |       | 2                        |                        |                       |       |

| Species                              | MALDI-TOF MS identification |                        |                       |       | Classical identification |                        |                       |       |
|--------------------------------------|-----------------------------|------------------------|-----------------------|-------|--------------------------|------------------------|-----------------------|-------|
|                                      | Correct at species level    | Correct at genus level | Mis-ID at genus level | No ID | Correct at species level | Correct at genus level | Mis-ID at genus level | No ID |
| <i>Scedosporium boydii</i> (1)       | 1                           |                        |                       |       | 1*                       |                        |                       |       |
| <i>Sordaria fimicola</i> (1)         | 1                           |                        |                       |       |                          |                        | 1                     |       |
| <i>Sordaria lappae</i> (1), NA       |                             | 1                      |                       |       |                          | 1                      |                       |       |
| <i>Talaromyces piceus</i> (2), NA    |                             |                        |                       | 2     |                          |                        |                       | 2     |
| <i>Trichoderma capillare</i> (2), NA |                             | 1                      |                       | 1     |                          |                        |                       | 2     |
| <i>Trichoderma hamatum</i> (1)       | 1                           |                        |                       |       |                          | 1                      |                       |       |
| <i>Trichophyton benhamiae</i> (1)    | 1                           |                        |                       |       |                          | 1                      |                       |       |
| <i>Trichophyton equinum</i> (2)      | 2                           |                        |                       |       | 2                        |                        |                       |       |
| <i>Trichophyton</i> sp. (1), NA      |                             |                        |                       | 1     |                          | 1                      |                       |       |
| <i>Wickerhamomyces anomalus</i> (5)  | 5                           |                        |                       |       | 4                        |                        |                       | 1     |
| <i>Yamadazyma mexicana</i> (1), NA   |                             |                        |                       | 1     |                          |                        |                       | 1     |
| Total                                | 258                         | 5                      | 3                     | 24    | 174                      | 22                     | 31                    | 63    |

ID = identification; NA = species not available in MALDI-TOF MS database. Number of isolates in parentheses.

\* Morphologic identification at the species complex level.

### References

- Berbee ML, et al. *Cochliobolus* phylogenetics and the origin of known, highly virulent pathogens, inferred from ITS and glyceraldehyde-3-phosphate dehydrogenase gene sequences. *Mycologia* 1999;91:964–977.

2. Carbone I, Kohn LM. A method for designing primer sets for speciation studies in filamentous ascomycetes. *Mycologia* 1999;91:553–556.
3. Ewing A, et al. 16S and 23S plastid rDNA phylogenies of *Prototheca* species and their auxanographic phenotypes. *J Phycol* 2014;50:765–769.
4. Glass NL, Donaldson GC. Development of primer sets designed for use with the PCR to amplify conserved genes from filamentous ascomycetes. *Appl Environ Microbiol* 1995;61:1323–1330.
5. Hubka V, Kolarik M.  $\beta$ -tubulin paralogue *tubC* is frequently misidentified as the *benA* gene in *Aspergillus* section *Nigri* taxonomy: primer specificity testing and taxonomic consequences. *Persoonia* 2012;29:1–10.
6. Liu YJ, et al. Phylogenetic relationships among ascomycetes: evidence from an RNA polymerase II subunit. *Mol Biol Evol* 1999;16:1799–1808.
7. Lopandic K, et al. Molecular characterization of the closely related *Debaryomyces* species: proposition of *D. vindobonensis* sp. nov. from a municipal wastewater treatment plant. *J Gen Appl Microbiol* 2013;59:49–58.
8. O'Donnell K, et al. A multigene phylogeny of the *Gibberella fujikuroi* species complex: detection of additional phylogenetically distinct species. *Mycoscience* 2000;41:61–78.
9. Peterson SW. Phylogenetic analysis of *Aspergillus* species using DNA sequences from four loci. *Mycologia* 2008;100:205–226.
10. Vilgalys R, Hester M. Rapid genetic identification and mapping of enzymatically amplified ribosomal DNA from several *Cryptococcus* species. *J Bacteriol* 1990;172:4238–4246.



11. White TJ, et al. Amplification and direct sequencing of fungal ribosomal RNA genes for phylogenetics. In: Innis MA, et al., eds. PCR Protocols: A Guide to Methods and Applications. New York, NY: Academic Press, 1990:315–322.
